# Supplementary material for: Traumatic brain injury: a comparison of diffusion and volumetric magnetic resonance imaging measures
Source: PubMed Central journal article supplement (PMC8105496; doi:10.1093/braincomms/fcab006), 2021-01-02
Supplement: fcab006_supplementary_data.pdf [file fcab006_supplementary_data.pdf]

**Supplementary material for Traumatic brain injury: a comparison of diffusion and volumetric magnetic resonance imaging measures**

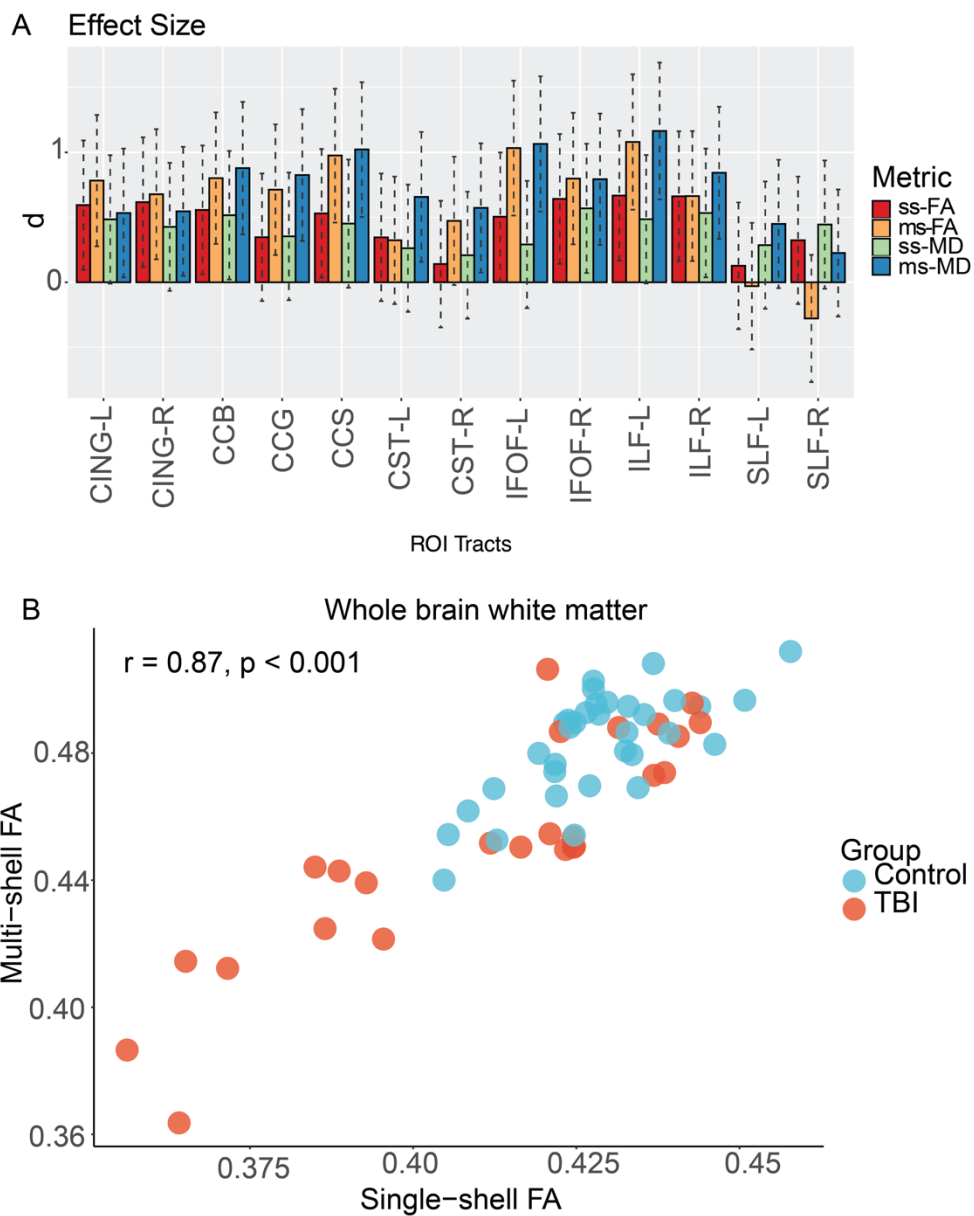

**Supplementary Figure 1: Comparison of single & multi-shell metrics.** A) Effect sizes for single (ss) & multi-shell (ms) FA and MD. B) Relationship of whole brain white matter skeleton for single & multi shell FA.

**Supplementary Table 1. Neuropsychological measures in healthy controls and traumatic brain injury patients.** Independent sample t-tests were conducted with the Wilcoxon Rank Sum Test with FDR multiple comparison correction between all pairwise means. WASI = Wechsler Abbreviated Scale for Intelligence; WTAR = Wechsler Test for Adult Reading; WMS-III = Wechsler Memory Scale; HADS = Hospital Anxiety & Depression Rating Scale; LARS = Lille Apathy Rating Scale; SF-36 = Short Form-36; CRT = Choice reaction time; RT = Reaction time; s = seconds;

| <b>Domain</b>             | <b>Neuropsychological Test</b>                          | <b>Healthy Controls Mean (+/- SD)</b> | <b>TBI Patients Mean (+/- SD)</b> | <b>W</b> | <b>p-uncorrected</b> | <b>p-FDR corrected</b> |
|---------------------------|---------------------------------------------------------|---------------------------------------|-----------------------------------|----------|----------------------|------------------------|
| <b>Processing speed</b>   | Trail Making Test A (s)                                 | 20.59 (5.78)                          | 31.7 (17.61)                      | 194      | 0.036                | 0.04                   |
|                           | Trail Making Test B (s)                                 | 50.13 (25.75)                         | 67.23 (33.65)                     | 188      | 0.027                | 0.03                   |
|                           | Stroop Colour Naming & Word Reading Composite Score (s) | 26.63 (6.22)                          | 31.23 (7.78)                      | 188.5    | 0.028                | 0.8                    |
|                           | CRT Median RT (s)                                       | 0.43 (0.06)                           | 0.53 (0.9)                        | 115.5    | <0.001               | <0.01                  |
| <b>Executive Function</b> | Trail Making Test B-A (s)                               | 32.5 (21.85)                          | 34.57 (23.44)                     | 288      | 0.82                 | 0.82                   |
|                           | Stroop Inhibition (s)                                   | 50.94 (13.75)                         | 61.37 (15.8)                      | 185.6    | 0.024                | 0.03                   |
|                           | Stroop Inhibition-Switching (s)                         | 58 (14.78)                            | 73.2 (17.56)                      | 126      | <0.001               | <0.01                  |
|                           | Stroop Inhibition-Switching vs. Baseline Contrast (s)   | 31.37 (15.03)                         | 41.97 (13.09)                     | 149.5    | 0.003                | 0.03                   |
| <b>Memory</b>             | WMS-III Immediate Recall (Total I)                      | 50.95 (6.97)                          | 34.87 (11.55)                     | 497.5    | <0.001               | <0.01                  |
|                           | WMS-III Delayed Recall (Total II)                       | 32.26 (6.38)                          | 20.6 (10.96)                      | 471      | <0.001               | <0.01                  |

|                             |                              |               |               |       |        |       |
|-----------------------------|------------------------------|---------------|---------------|-------|--------|-------|
|                             | People Test Immediate Recall | 28.85 (5.56)  | 23.4 (7.06)   | 451.5 | <0.01  | <0.01 |
|                             | People Test Delayed Recall   | 10.2 (2.33)   | 8.3 (3.47)    | 394   | 0.05   | 0.06  |
| <b>Intellectual ability</b> | WASI Matrix reasoning        | 29.15 (4.79)  | 27.67 (3.57)  | 379   | 0.11   | 0.1   |
|                             | WTAR Scaled                  | 116.5 (5.5)   | 108 (11.22)   | 449.5 | <0.01  | <0.01 |
| <b>Behavioural reports</b>  | LARS Self Total (apathy)     | -33.53 (2.75) | -23.28 (9.52) | 50.5  | <0.001 | <0.01 |
|                             | HADS-D                       | 3.33 (2.87)   | 7.07 (4.34)   | 105.5 | <0.001 | <0.01 |
|                             | HADS-A                       | 5.27 (3.43)   | 8.41 (4.79)   | 135   | 0.041  | 0.04  |
|                             | SF-36 General Health         | 78.67 (16.2)  | 55.86 (23.07) | 342   | 0.002  | <0.01 |
|                             | SF-36 Physical Functioning   | 96.33 (4.81)  | 70.86 (24.28) | 365   | <0.001 | <0.01 |
|                             | SF-36 Emotional Wellbeing    | 78.13 (12.73) | 61.93 (20.75) | 322.5 | 0.009  | 0.01  |
|                             | SF-36 Social Functioning     | 88.33 (16)    | 59.91 (20.15) | 377.5 | <0.001 | <0.01 |
|                             | SF-36 Energy/Fatigue         | 63.67 (16.53) | 39.48 (21.06) | 354.5 | <0.001 | <0.01 |

**Supplementary Table 2: Clinical demographics**

| Study ID | Group | Age | Gender | Time since Injury (months) | Length of PTA (Days) | Cause of Injury | Extracranial Injury Requiring Hospital | Days in Hospital | Site of impact | Lowest GCS | Length of LOC | Initial CT findings                                                                                                                                                   | Initial MRI Findings                                                                                                                                 | GOS | UPDRS | Past Medical History              | Medications at Visit |
|----------|-------|-----|--------|----------------------------|----------------------|-----------------|----------------------------------------|------------------|----------------|------------|---------------|-----------------------------------------------------------------------------------------------------------------------------------------------------------------------|------------------------------------------------------------------------------------------------------------------------------------------------------|-----|-------|-----------------------------------|----------------------|
| DREAM016 | TBI   | 46  | M      | 37                         | 15                   | RTA             | Yes                                    | 14               | Frontal, Right | 14         | 1-29 minutes  | SAH: Left Sylvian Fissure                                                                                                                                             | Microbleeds: Parafalcine, Left Frontal, Right Frontal                                                                                                | 7   | 0     | Gastro-oesophageal reflux disease | None                 |
| DREAM017 | TBI   | 20  | M      | 23                         | 60                   | RTA             | Yes                                    | 50               | Occipital      | 13         | 1-29 minutes  | SAH; Fracture: Left Occipital Bone; Contusion: Left Frontal, Right Frontal, Left Temporal, Right Temporal, Left Parietal, Right Parietal; SDH: Right Parieto-Temporal | Contusion: Right Temporal Pole, Right Frontal Pole; Microhaemorrhage: Left Parietal Lobe, Left Frontal Lobe, Left Temporal Lobe, Left Occipital Lobe | 5   | 0     | None                              | None                 |

| Study ID | Group | Age | Gender | Time since Injury (months) | Length of PTA (Days) | Cause of Injury       | Extracranial Injury Requiring Hospital | Days in Hospital | Site of impact     | Lowest GCS | Length of LOC | Initial CT findings                                          | Initial MRI Findings                                                                                                                                                 | GOS | UPDRS | Past Medical History | Medications at Visit |
|----------|-------|-----|--------|----------------------------|----------------------|-----------------------|----------------------------------------|------------------|--------------------|------------|---------------|--------------------------------------------------------------|----------------------------------------------------------------------------------------------------------------------------------------------------------------------|-----|-------|----------------------|----------------------|
| DREAM021 | TBI   | 52  | M      | 43                         | 5                    | RTA                   | Yes                                    | 42               | Unknown            | 15         | 0 - 1 Minute  | Normal                                                       | Microhaemorrhage: Parafalcine, Left Frontal, Right Frontal                                                                                                           | 6   | 0     | None                 | None                 |
| DREAM022 | TBI   | 45  | M      | 32                         | 14                   | Other Non Intentional | No                                     | 0                | Frontal, Occipital | 15         | 0 - 1 Minute  | Not done                                                     | Normal                                                                                                                                                               | 6   | 0     | None                 | None                 |
| DREAM025 | TBI   | 31  | M      | 73                         | 90                   | Violence              | No                                     | 120              | Unknown            | 6          | Unknown       | Fracture: Right orbital wall and floor, Right zygomatic arch | Contusion: Left Temporal Pole, Right Temporal Pole; Atrophy: Cerebellum; Superficial Siderosis: Cerebellum; Microhaemorrhage: Right Temporal Lobe, Left Frontal Lobe | 5   | 22    | None                 | None                 |

| Study ID | Group | Age | Gender | Time since Injury (months) | Length of PTA (Days) | Cause of Injury       | Extracranial Injury Requiring Hospital | Days in Hospital | Site of impact | Lowest GCS | Length of LOC | Initial CT findings  | Initial MRI Findings                                                                                                                                           | GOS | UPDRS | Past Medical History | Medications at Visit           |
|----------|-------|-----|--------|----------------------------|----------------------|-----------------------|----------------------------------------|------------------|----------------|------------|---------------|----------------------|----------------------------------------------------------------------------------------------------------------------------------------------------------------|-----|-------|----------------------|--------------------------------|
| DREAM026 | TBI   | 49  | M      | 249                        | 120                  | Other Non Intentional | Yes                                    | 120              | Frontal, Right | 3          | None          | Unknown (in Bahamas) | Atrophy: Global, cerebellar, brain stem; Contusion: Right Frontal, Left Frontal, Right Temporal; Microhaemorrhage: Right Frontal, Left Frontal, Right Temporal | 5   | 3     | Rosacea              | Sildenafil PRN, Loperamide PRN |
| DREAM028 | TBI   | 24  | M      | 8                          | 14                   | RTA                   | Yes                                    | 15               | Right          | Unknown    | Unknown       | Normal               | Microhaemorrhage: Parafalcine, Right Frontal, Left Frontal, Left Parietal, Left lentiform nucleus, Left Temporal, Right Temporal                               | 6   | 0     | None                 | None                           |

| Study ID | Group | Age | Gender | Time since Injury (months) | Length of PTA (Days) | Cause of Injury   | Extracranial Injury Requiring Hospital | Days in Hospital | Site of impact      | Lowest GCS | Length of LOC | Initial CT findings                                                                                                                                                             | Initial MRI Findings                                                                                                                                                                                                                                                                              | GOS | UPDRS | Past Medical History | Medications at Visit                                 |
|----------|-------|-----|--------|----------------------------|----------------------|-------------------|----------------------------------------|------------------|---------------------|------------|---------------|---------------------------------------------------------------------------------------------------------------------------------------------------------------------------------|---------------------------------------------------------------------------------------------------------------------------------------------------------------------------------------------------------------------------------------------------------------------------------------------------|-----|-------|----------------------|------------------------------------------------------|
| DREAM033 | TBI   | 52  | M      | 17                         | 21                   | Incident/<br>Fall | No                                     | 85               | Occipital,<br>Right | 8          | 1-29 minutes  | SDH:<br>Large Left with<br>midline<br>shift; SAH:<br>Bilateral;<br>Contusion:<br>Left<br>Frontal,<br>Right<br>Occipital;<br>Fracture:<br>Occipital<br>bone,<br>Sphenoid<br>bone | Contusion:<br>Left<br>Temporal<br>Lobe, Left<br>Frontal Lobe,<br>Right Frontal<br>Lobe, Left<br>Cerebellar<br>Hemisphere;<br>Microhaemorrhage:<br>Left<br>Temporal,<br>Left Frontal,<br>Right<br>Temporal,<br>Right<br>Frontal;<br>Superficial<br>Siderosis:<br>Left Frontal,<br>Left<br>Temporal | 6   | 0     | None                 | Levetirecetam 1250mg<br>BD,<br>Perindopril<br>2mg OD |

| Study ID | Group | Age | Gender | Time since Injury (months) | Length of PTA (Days) | Cause of Injury | Extracranial Injury Requiring Hospital | Days in Hospital | Site of impact  | Lowest GCS | Length of LOC | Initial CT findings                                                                                                   | Initial MRI Findings                                                                                                       | GOS | UPDRS | Past Medical History | Medications at Visit                              |
|----------|-------|-----|--------|----------------------------|----------------------|-----------------|----------------------------------------|------------------|-----------------|------------|---------------|-----------------------------------------------------------------------------------------------------------------------|----------------------------------------------------------------------------------------------------------------------------|-----|-------|----------------------|---------------------------------------------------|
| DREAM037 | TBI   | 54  | M      | 11                         | 15                   | Violence        | No                                     | 20               | Right           | 12         | 1-24 Hours    | SDH: Right; SAH: Left Frontal, Right Frontal; Contusion: Left Frontal, Left Temporal, Right Temporal, Right Occipital | Contusion: Right Temporal, Right Parietal, Right Frontal, Left Frontal, Left Temporal; Superficial Siderosis: Left Frontal | 5   | 0     | None                 | None                                              |
| DREAM038 | TBI   | 26  | M      | 17                         | 56                   | Violence        | No                                     | 49               | Left, Occipital | Unknown    | None          | Contusion: Left Frontal, Left Temporal, Left Parietal; SAH: Left Parietal; SDH: Left                                  | Contusion: Left Frontal, Left Parietal; Superficial Siderosis: Left Parietal, Left Frontal                                 | 5   | 0     | None                 | Amitriptylline 10mg OD, Sodium Valproate 100mg OD |



| Study ID | Group | Age | Gender | Time since Injury (months) | Length of PTA (Days) | Cause of Injury | Extracranial Injury Requiring Hospital | Days in Hospital | Site of impact | Lowest GCS | Length of LOC | Initial CT findings                                                                                      | Initial MRI Findings                                            | GOS | UPDRS | Past Medical History       | Medications at Visit                     |
|----------|-------|-----|--------|----------------------------|----------------------|-----------------|----------------------------------------|------------------|----------------|------------|---------------|----------------------------------------------------------------------------------------------------------|-----------------------------------------------------------------|-----|-------|----------------------------|------------------------------------------|
| DREAM039 | TBI   | 21  | F      | 14                         | 35                   | RTA             | Yes                                    | 49               | Unknown        | 14         | Unknown       | Normal                                                                                                   | Microhaemorrhage: Left Frontal, Corpus Callosum, Right Frontal  | 6   | 0     | None                       | Fluoxetine 20mg OD, Propranolol 10mg PRN |
| DREAM040 | TBI   | 39  | F      | 6                          | 2                    | Incident/Fall   | No                                     | 3                | Left, Frontal  | 15         | 0 - 1 Minute  | SDH: Tentorium cerebelli                                                                                 | Normal                                                          | 6   | 0     | None                       | None                                     |
| DREAM041 | TBI   | 54  | M      | 24                         | 1                    | Incident/Fall   | No                                     | 5                | Unknown        | 10         | Unknown       | Contusion: Left Temporal Lobe; SAH: Right Parietal, Left Temporal; Fracture: Left Squamous Temporal Bone | Contusion: Left Temporal Lobe; Microhaemorrhage: Right Temporal | 8   | 0     | Inflammatory Bowel Disease | Vitamin D                                |

| Study ID | Group | Age | Gender | Time since Injury (months) | Length of PTA (Days) | Cause of Injury | Extracranial Injury Requiring Hospital | Days in Hospital | Site of impact   | Lowest GCS | Length of LOC | Initial CT findings                                                                                            | Initial MRI Findings                                                                                                         | GOS | UPDRS | Past Medical History | Medications at Visit                 |
|----------|-------|-----|--------|----------------------------|----------------------|-----------------|----------------------------------------|------------------|------------------|------------|---------------|----------------------------------------------------------------------------------------------------------------|------------------------------------------------------------------------------------------------------------------------------|-----|-------|----------------------|--------------------------------------|
| DREAM042 | TBI   | 47  | M      | 51                         | 3                    | RTA             | No                                     | 4                | Right, Occipital | 14         | 1-29 minutes  | SAH: Bilateral; SDH: Right Frontal, Right Parietal, Left Frontal, Left Parietal; Fracture: Right Temporal Bone | Contusion: Right Parietal Lobe; Microhaemorrhage: Subcortical; Superficial Siderosis: Right Parietal Lobe, Left Frontal Lobe | 6   | 0     | None                 | Atorvastatin 10mg OD, Growth Hormone |

| Study ID | Group | Age | Gender | Time since Injury (months) | Length of PTA (Days) | Cause of Injury | Extracranial Injury Requiring Hospital | Days in Hospital | Site of impact | Lowest GCS | Length of LOC | Initial CT findings                                                  | Initial MRI Findings                                                                                                                                                                                                 | GOS | UPDRS | Past Medical History | Medications at Visit |
|----------|-------|-----|--------|----------------------------|----------------------|-----------------|----------------------------------------|------------------|----------------|------------|---------------|----------------------------------------------------------------------|----------------------------------------------------------------------------------------------------------------------------------------------------------------------------------------------------------------------|-----|-------|----------------------|----------------------|
| DREAM044 | TBI   | 22  | M      | 21                         | 540                  | RTA             | Yes                                    | 90               | Crown          | 3          | > 7 Days      | SAH: Right Frontal, Left Frontal; Contusion: Splenium, Left Temporal | Contusion: Left Frontal, Right Frontal, Splenium, Left Thalamus, Left Temporal; Atrophy: Global; Microhaemorrhage: Subcortical, Parafalcine, Left Temporal, Right Temporal, Splenium, Right Frontal, Left Cerebellar | 4   | 33    | None                 | None                 |

| Study ID | Group | Age | Gender | Time since Injury (months) | Length of PTA (Days) | Cause of Injury | Extracranial Injury Requiring Hospital | Days in Hospital | Site of impact  | Lowest GCS | Length of LOC | Initial CT findings | Initial MRI Findings                                                                 | GOS | UPDRS | Past Medical History | Medications at Visit                                                                                     |
|----------|-------|-----|--------|----------------------------|----------------------|-----------------|----------------------------------------|------------------|-----------------|------------|---------------|---------------------|--------------------------------------------------------------------------------------|-----|-------|----------------------|----------------------------------------------------------------------------------------------------------|
| DREAM046 | TBI   | 48  | M      | 366                        | 60                   | RTA             | Yes                                    | 60               | Frontal         | 3          | > 7 Days      | Unknown             | Contusion: Parafalcine, Left Frontal, Right Frontal; Microhaemorrhage: Left Temporal | 4   | 0     | Arthritis            | Amitrpylline 20mg TDS, Esomeprazole 40mg OD, Solifenacin 5mg TDS, Botox injections, Gabapentin 600mg TDS |
| DREAM047 | TBI   | 38  | M      | 210                        | 720                  | Violence        | No                                     | 180              | Unknown         | 3          | > 7 Days      | Unknown             | Contusion: Left Occipital; Atrophy: Cerebellar, Pons, Left hemisphere                | 5   | 7     | None                 | None                                                                                                     |
| DREAM048 | TBI   | 49  | F      | 158                        | 7                    | Violence        | No                                     | 7                | Left, Occipital | Unknown    | 1-29 minutes  | Unknown             | Normal                                                                               | 5   | 0     | Hypothyroid          | Levothyroxine 150 mcg OD, Omeprazole 20mg OD, Pyridoxine                                                 |

| Study ID | Group | Age | Gender | Time since Injury (months) | Length of PTA (Days) | Cause of Injury | Extracranial Injury Requiring Hospital | Days in Hospital | Site of impact | Lowest GCS | Length of LOC | Initial CT findings | Initial MRI Findings                                                                                                                                         | GOS | UPDRS | Past Medical History | Medications at Visit |
|----------|-------|-----|--------|----------------------------|----------------------|-----------------|----------------------------------------|------------------|----------------|------------|---------------|---------------------|--------------------------------------------------------------------------------------------------------------------------------------------------------------|-----|-------|----------------------|----------------------|
| DREAM052 | TBI   | 36  | F      | 219                        | 120                  | RTA             | No                                     | 160              | Frontal        | Unknown    | Unknown       | Unknown             | Contusion: Right Temporal Lobe; Microhaemorrhage: Right Frontal Lobe, Posterior Limb Right Internal Capsule, Right Occipital Lobe; Atrophy: Cerebellum, Pons | 4   | 43    | None                 | None                 |

| Study ID | Group | Age | Gender | Time since Injury (months) | Length of PTA (Days) | Cause of Injury | Extracranial Injury Requiring Hospital | Days in Hospital | Site of impact   | Lowest GCS | Length of LOC | Initial CT findings                           | Initial MRI Findings                                                                                                                      | GOS | UPDRS | Past Medical History | Medications at Visit                         |
|----------|-------|-----|--------|----------------------------|----------------------|-----------------|----------------------------------------|------------------|------------------|------------|---------------|-----------------------------------------------|-------------------------------------------------------------------------------------------------------------------------------------------|-----|-------|----------------------|----------------------------------------------|
| DREAM053 | TBI   | 43  | M      | 6                          | 42                   | RTA             | Yes                                    | 66               | Facial           | 3          | 1-29 minutes  | SDH: Right; Contusion: Right Frontal Lobe     | Superficial Siderosis: Right Frontal Lobe (vertex); Microhaemorrhage: Right Frontal lobe, Corpus Callosum (Genu and Splenium), Mid Brain. | 5   | 0     | None                 | None                                         |
| DREAM054 | TBI   | 31  | M      | 22                         | 21                   | Violence        | No                                     | 4                | Right, Occipital | Unknown    | 1-29 minutes  | Contusion: Right Frontal, Right Temporal Lobe | Contusion: Right Frontal, Right Temporal Lobe                                                                                             | 8   | 0     | None                 | Lamotrigine 50mg BD, Growth Hormone 2 mg OD. |

| Study ID | Group | Age | Gender | Time since Injury (months) | Length of PTA (Days) | Cause of Injury   | Extracranial Injury Requiring Hospital | Days in Hospital | Site of impact | Lowest GCS | Length of LOC | Initial CT findings | Initial MRI Findings                                                                                                                                                            | GOS | URS | Past Medical History | Medications at Visit |
|----------|-------|-----|--------|----------------------------|----------------------|-------------------|----------------------------------------|------------------|----------------|------------|---------------|---------------------|---------------------------------------------------------------------------------------------------------------------------------------------------------------------------------|-----|-----|----------------------|----------------------|
| DREAM055 | TBI   | 37  | M      | 205                        | 120                  | Incident/<br>Fall | Yes                                    | 150              | Right          | 3          | > 7 Days      | Unknown             | Contusion: Right Frontal Lobe, Left Frontal Lobe, Left Temporal Lobe; Atrophy: Corpus Callosum, Left Temporal Lobe, Right Cerebral Peduncle; Previous Right Frontal Craniectomy | 5   | 0   | None                 | Tegetrol CR 400mg BD |

| Study ID | Group | Age | Gender | Time since Injury (months) | Length of PTA (Days) | Cause of Injury | Extracranial Injury Requiring Hospital | Days in Hospital | Site of impact  | Lowest GCS | Length of LOC | Initial CT findings                                                                                                                                 | Initial MRI Findings                                                                                                                                              | GOS | UPDRS | Past Medical History | Medications at Visit                 |
|----------|-------|-----|--------|----------------------------|----------------------|-----------------|----------------------------------------|------------------|-----------------|------------|---------------|-----------------------------------------------------------------------------------------------------------------------------------------------------|-------------------------------------------------------------------------------------------------------------------------------------------------------------------|-----|-------|----------------------|--------------------------------------|
| DREAM056 | TBI   | 33  | M      | 147                        | 28                   | RTA             | No                                     | 30               | Left, Occipital | 5          | Unknown       | Fracture: Left Squamous Temporal Bone; Contusion: Right Frontal Lobe, Left Frontal Lobe, Left Temporal Lobe; SAH: Left Frontal, Left Temporal Lobes | Contusion: Right Frontal Lobe; Microhaemorrhage: Parafalcine, Right Frontal, Left Frontal; High Signal: Periventricular and Pontine, inkeeping with demyelination | 6   | 11    | None                 | Baclofen 20mg OD, Citalopram 10mg OD |



| Study ID | Group | Age | Gender | Time since Injury (months) | Length of PTA (Days) | Cause of Injury   | Extracranial Injury Requiring Hospital | Days in Hospital | Site of impact   | Lowest GCS | Length of LOC | Initial CT findings | Initial MRI Findings                                                                                                                   | GOS | UPDRS | Past Medical History | Medications at Visit |
|----------|-------|-----|--------|----------------------------|----------------------|-------------------|----------------------------------------|------------------|------------------|------------|---------------|---------------------|----------------------------------------------------------------------------------------------------------------------------------------|-----|-------|----------------------|----------------------|
| DREAM057 | TBI   | 34  | M      | 9                          | 7                    | Incident/<br>Fall | No                                     | 3                | Right, Occipital | 10         | 1-24 Hours    | Normal              | Contusion: Left Caudate Head;<br>Microhaemorrhage: Left Temporal Pole, Left Occipital Lobe, Parafalcine (Left and Right Frontal Lobes) | 6   | 0     | None                 | None                 |

| Study ID | Group | Age | Gender | Time since Injury (months) | Length of PTA (Days) | Cause of Injury | Extracranial Injury Requiring Hospital | Days in Hospital | Site of impact | Lowest GCS | Length of LOC | Initial CT findings                                                                                                                                                                               | Initial MRI Findings                                                                                                                                                               | GOS | UPDRS | Past Medical History | Medications at Visit |
|----------|-------|-----|--------|----------------------------|----------------------|-----------------|----------------------------------------|------------------|----------------|------------|---------------|---------------------------------------------------------------------------------------------------------------------------------------------------------------------------------------------------|------------------------------------------------------------------------------------------------------------------------------------------------------------------------------------|-----|-------|----------------------|----------------------|
| DREAM060 | TBI   | 32  | M      | 73                         | 28                   | RTA             | Yes                                    | 28               | Unknown        | 3          | > 7 Days      | EDH: Right Temporal; Fracture: Right Temporal Bone, Right Greater Wing of Sphenoid, Left Frontal Bone, Left Greater Wing of Sphenoid, Left Maxillary Wall, Left Zygomatic Arch; SAH: Right Vertex | EDH: Left Frontal, Right Temporal, Left Occipital; SAH: Right Vertex; Contusion: Left Frontal Lobe; High Signal: Splenium; Microhaemorrhage: Left Frontal Lobe, Right Frontal Lobe | 6   | 0     | Asthma               | Symbicort            |

| Study ID | Group | Age | Gender | Time since Injury (months) | Length of PTA (Days) | Cause of Injury | Extracranial Injury Requiring Hospital | Days in Hospital | Site of impact   | Lowest GCS | Length of LOC | Initial CT findings                                                                                                                       | Initial MRI Findings                                                                                                                                                                                                                                       | GOS | UPDRS | Past Medical History              | Medications at Visit  |
|----------|-------|-----|--------|----------------------------|----------------------|-----------------|----------------------------------------|------------------|------------------|------------|---------------|-------------------------------------------------------------------------------------------------------------------------------------------|------------------------------------------------------------------------------------------------------------------------------------------------------------------------------------------------------------------------------------------------------------|-----|-------|-----------------------------------|-----------------------|
| DREAM061 | TBI   | 52  | M      | 23                         | 4                    | Violence        | No                                     | 3                | Occipital        | 14         | Unknown       | Fracture: Occipital bone                                                                                                                  | Contusion Right Frontal Lobe, Left Frontal Lobe, Left Temporal Lobe, Right Temporal Lobe                                                                                                                                                                   | 6   | 0     | Gastro-oesophageal reflux disease | Lanzoprazole 15 mg OD |
| DREAM063 | TBI   | 38  | M      | 9                          | 14                   | Violence        | No                                     | 14               | Occipital, Crown | 3          | 1-24 Hours    | Contusion: Left Frontal Lobe, Right Frontal Lobe, Right Temporal Lobe; SDH: Parafalcine; SAH: Parafalcine; Fracture: Right Occipital Bone | Contusion: Right Frontal Lobe (superior frontal gyrus and frontal pole), Right Temporal Lobe (temporal pole), Left Frontal Lobe to a lesser degree; Superficial Siderosis: Vertex, right worse than left; Microhaemorrhages: Vertex, right worse than left | 6   | 0     | None                              | None                  |

| Study ID | Group | Age | Gender | Time since Injury (months) | Length of PTA (Days) | Cause of Injury | Extracranial Injury Requiring Hospital | Days in Hospital | Site of impact | Lowest GCS | Length of LOC | Initial CT findings                                                               | Initial MRI Findings                                                                                                                                                                                                                                   | GOS | UPDRS | Past Medical History | Medications at Visit |
|----------|-------|-----|--------|----------------------------|----------------------|-----------------|----------------------------------------|------------------|----------------|------------|---------------|-----------------------------------------------------------------------------------|--------------------------------------------------------------------------------------------------------------------------------------------------------------------------------------------------------------------------------------------------------|-----|-------|----------------------|----------------------|
| DREAM064 | TBI   | 31  | M      | 112                        | 120                  | RTA             | No                                     | 71               | Occipital      | 6          | > 7 Days      | Contusion: Left Frontal Lobe, Right Frontal Lobe, Corpus Callosum, Right Thalamus | Contusion: Parafalcine (Right and Left Frontal Lobes, worse on Right), Right Thalamus, Right and Left Parietal Lobes; Microhaemorrhage: Left Frontal Lobe, Right Frontal Lobe, Right Temporal Pole, Left Hippocampus; Atrophy: Cerebellum and globally | 5   | 11    | None                 | None                 |

| Study ID | Group | Age | Gender | Time since Injury (months) | Length of PTA (Days) | Cause of Injury | Extracranial Injury Requiring Hospital | Days in Hospital | Site of impact  | Lowest GCS | Length of LOC | Initial CT findings                                                                                                      | Initial MRI Findings                                                                                                                                                                                             | GOS | UPDRS | Past Medical History | Medications at Visit |
|----------|-------|-----|--------|----------------------------|----------------------|-----------------|----------------------------------------|------------------|-----------------|------------|---------------|--------------------------------------------------------------------------------------------------------------------------|------------------------------------------------------------------------------------------------------------------------------------------------------------------------------------------------------------------|-----|-------|----------------------|----------------------|
| DREAM065 | TBI   | 39  | M      | 33                         | 8                    | RTA             | Yes                                    | 14               | Frontal, Right  | 13         | 1-29 minutes  | Contusion: Left Frontal Lobe                                                                                             | Contusion: Left Orbito-Frontal Lobe, Right Orbito-Frontal Lobe (worse on the left).                                                                                                                              | 5   | 0     | None                 | None                 |
| DREAM067 | TBI   | 24  | F      | 16                         | 120                  | RTA             | No                                     | 30               | Occipital, Left | 3          | Unknown       | Contusion: Right Thalamus, Left Frontal Lobe, Right Frontal Lobe, Left Occipital Lobe, Right Occipital Lobe; SDH: Vertex | Contusion: Left Frontal Lobe, Right Frontal Lobe, Left Temporal Lobe, Corpus Callosum; Microhaemorrhage: Right Parietal Lobe, Left Temporal Lobe, Corpus Callosum; Atrophy: Splenium and Genu of Corpus Callosum | 6   | 1     | None                 | Citalopram 40mg OD   |
